# Supplementary figures and images for: Unveiling nanoscale fluid miscible behaviors with nanofluidic slim-tube
Source: Royal Society of Chemistry journal article supplement (doi:10.1039/d4ee02292k), 2024-01-01

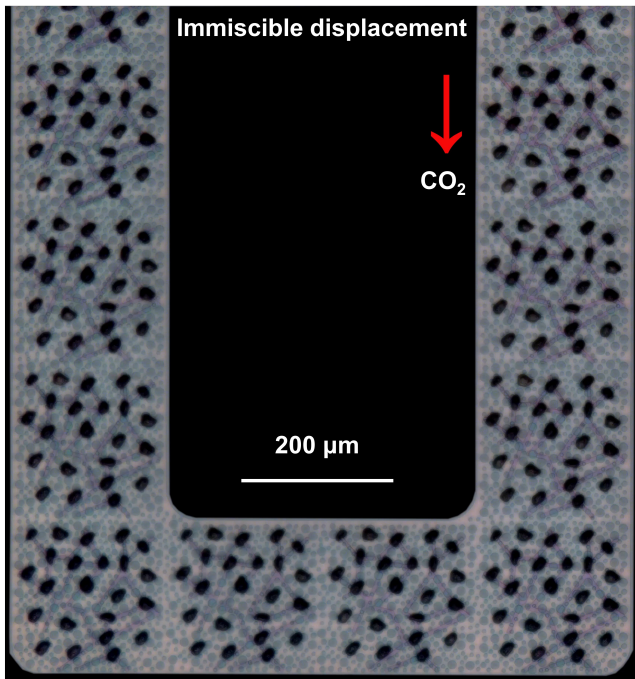

Supplement: d4ee02292k10.pdf [file d4ee02292k10.pdf]

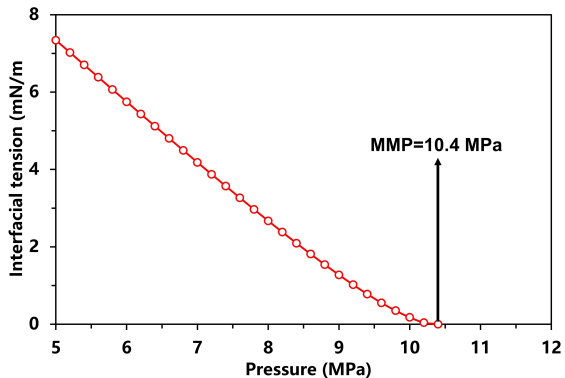

Supplement: d4ee02292k13.pdf [file d4ee02292k13.pdf]

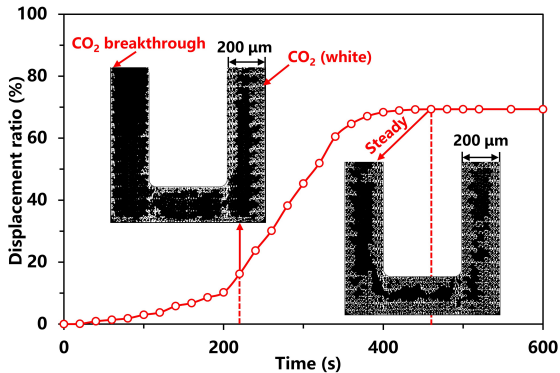

Supplement: d4ee02292k2.pdf [file d4ee02292k2.pdf]

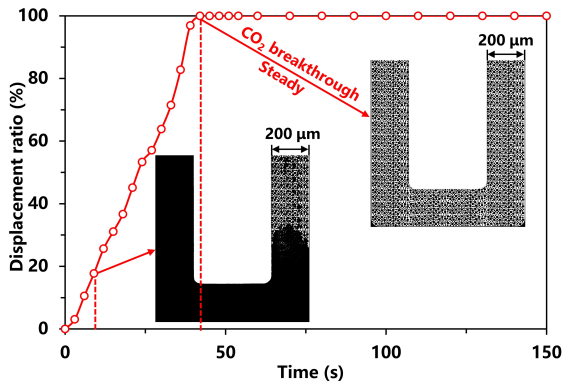

Supplement: d4ee02292k6.pdf [file d4ee02292k6.pdf]

(a)

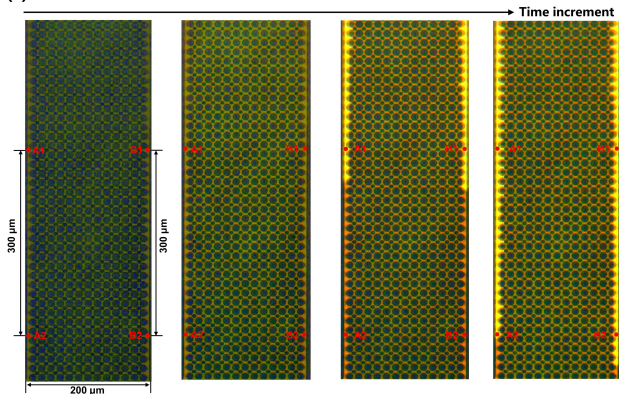

(b)

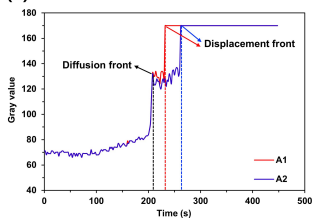

(c)

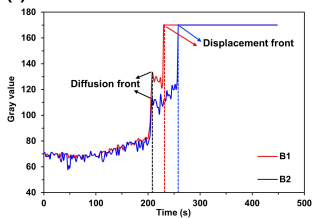

Supplement: d4ee02292k7.pdf [file d4ee02292k7.pdf]
